# Supplementary material for: Chromatin state dynamics during NK cell activation
Source: PubMed Central journal article supplement (PMC5522033; doi:10.18632/oncotarget.16688), 2017-03-29
Supplement: oncotarget-08-41854-s001.pdf [file oncotarget-08-41854-s001.pdf]

# Chromatin state dynamics during NK cell activation

## Supplementary Material

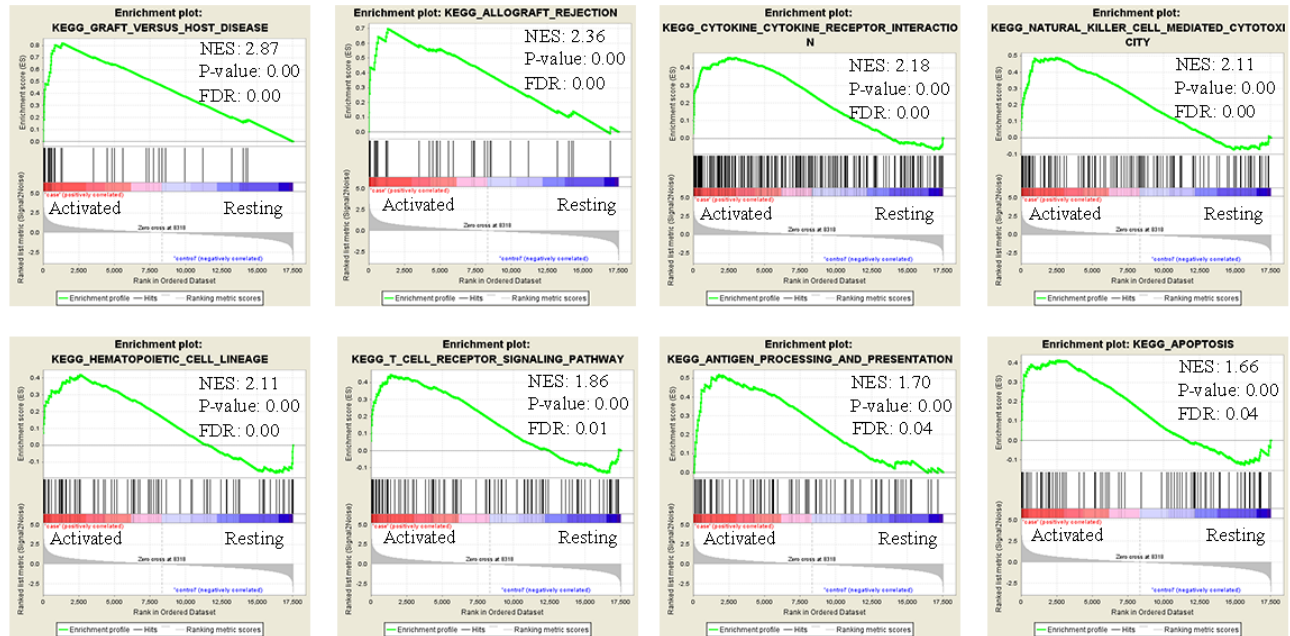

**Supplementary Figure 1:** Unbiased GSEA enrichment plot of indicated gene sets in expression data from activating NK cell compared to resting NK cell.

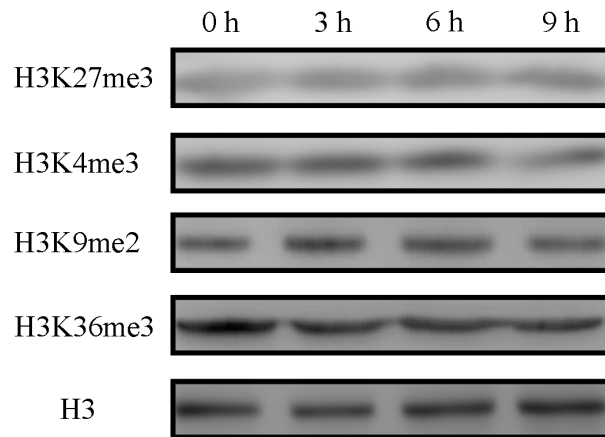

**Supplementary Figure 2:** Representative western blots were performed with antibody against H3K27me3, H3K4me3, H3K9me2, H3K36me3 and H3 as control. NK92MI cells were stimulated with PMA plus Ionomycin for indicated time points.

**Supplementary Table 1: RT-qPCR primers**

| Genes       | Primers                 |
|-------------|-------------------------|
| PIK3CA-F    | CCACGACCATCATCAGGTGAA   |
| PIK3CA-R    | CCTCACGGAGGCATTCTAAAGT  |
| TNFRSF11A-F | CACCAAATGAACCCCATGTTTAC |
| TNFRSF11A-R | GGACTCCTTATCTCCACTTAGGC |
| NFATC1-F    | CACCGCATCACAGGGAAGAC    |
| NFATC1-R    | GCACAGTCAATGACGGCTC     |
| TNFSF9-F    | CTCCGTTTCACTTGCGCTG     |
| TNFSF9-R    | TCAGTGTGAAGATGGACGCC    |
| ASH1L-f     | AACTGTCTTCAAACGAGAC     |
| ASH1L-r     | GAAGAGTAGATGGCGTTGCATTA |
| KMT2C-f     | TGGGTTACCTAGAGTGTGAC    |
| KMT2C-r     | CTGGCTGTAAACGATCCATCTC  |
| KDM2B-f     | TGTCCCAGTTTGTGCGTTACT   |
| KDM2B-r     | GGACGCTTGACCAAGTGCT     |
| KDM6B-f     | CACCCAGCAAACCATATTATGC  |
| KDM6B-r     | CACACAGCCATGCAGGGATT    |
| UTY-f       | CACAAAGAAGTTGCTCAGGTACG |
| UTY-r       | TGTGGTTGTCGATTAGAGACAGA |
| JARID2-f    | ACCAGTCTAAGGGATTAGGACC  |
| JARID2-r    | TGCTGGGACTATTCGGCTGA    |

**Chip-qPCR primers**

| Genes             | Primers               |
|-------------------|-----------------------|
| PIK3CA-CHIP-1F    | TCAAGGAGGAACCGATGCTG  |
| PIK3CA-CHIP-1R    | TAAGGGTTCGGTACTGTGCG  |
| PIK3CA-CHIP-2F    | AGCTTTGCCAGAATCCTCCC  |
| PIK3CA-CHIP-2R    | GCCATGCCTTGCTAGAGTC   |
| TNFRSF11A-CHIP-1F | ATGATTCCCTCCGTCCCTGA  |
| TNFRSF11A-CHIP-1R | GAGGGTCAAGTCCAGCATCC  |
| TNFRSF11A-CHIP-1F | TGAAAGGGCCAATGTGGTGA  |
| TNFRSF11A-CHIP-1R | GCCAGCAGCCACTATCTCTT  |
| NFATC1-CHIP-1F    | CTAGTCTCCAGACCCTGGCT  |
| NFATC1-CHIP-1R    | CGGTGGTCACTTGAGAGCTT  |
| NFATC1-CHIP-2F    | AAACCTACGAGGAGGCAGGA  |
| NFATC1-CHIP-2R    | CCTCTGTTTAATGCCGTTGCC |
| TNFSF9-CHIP-1F    | CCCGCTACGAGACCCTATCT  |
| TNFSF9-CHIP-1R    | CTGAGGGGTTGAGGACTGTG  |
| TNFSF9-CHIP-2F    | AGGAGACCCCAAGTTCCTTT  |
| TNFSF9-CHIP-2R    | TCTTCTTTCCAGCCCCCTTG  |
| NFATC1-CHIP-1F    | CTAGTCTCCAGACCCTGGCT  |
| NFATC1-CHIP-1R    | CGGTGGTCACTTGAGAGCTT  |
| NFATC1-CHIP-2F    | AAACCTACGAGGAGGCAGGA  |
| NFATC1-CHIP-2R    | CCTCTGTTTAATGCCGTTGCC |

|                |                      |
|----------------|----------------------|
| TNFSF9-CHIP-1F | CCCGCTACGAGACCCTATCT |
| TNFSF9-CHIP-1R | CTGAGGGGTTGAGGACTGTG |
| TNFSF9-CHIP-2F | AGGAGACCCCCAGTTCCTTT |
| TNFSF9-CHIP-2R | TCTTCTTTCCAGCCCCCTTG |

---
